# Supplementary material for: Electrochemical sensing of hydrazine using multilayer graphene nanobelts
Source: Royal Society of Chemistry journal article supplement (doi:10.1039/c5ra24912k), 2016-01-01
Supplement: c5ra24912k1.pdf [file c5ra24912k1.pdf]

## Electrochemical Sensing of Hydrazine using Multilayer Graphene Nanobelts

Padmanathan Karthick Kannan<sup>a</sup>, Stainslav A. Moshkalev<sup>b</sup> and Chandra Sekhar Rout<sup>a</sup>

<sup>a</sup>School of Basic Sciences, Indian Institute of Technology Bhubaneswar, Bhubaneswar, Odisha – 751013.

<sup>b</sup>Center for Semiconductor Components, State University of Campinas, Campinas, Sao Paulo, 13083-870, Brazil

\*Email: csrout@iitbbs.ac.in

Figure caption

**Fig. S1** Plot of response time of the GNB/GCE sensor to achieve steady state current

Table caption

**Table 1.** Comparison of the performance of hydrazine sensors based on various nanomaterials with the present work.

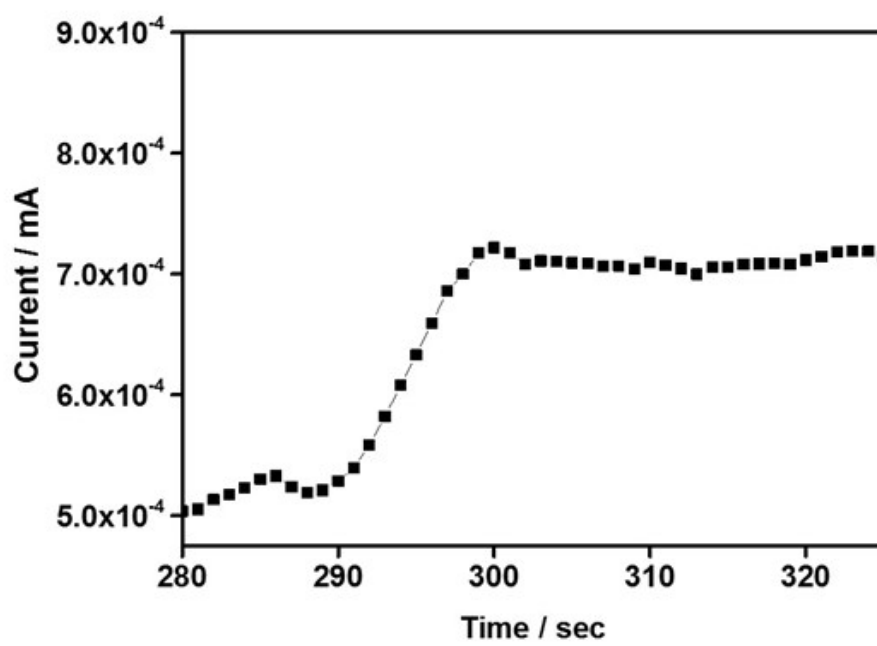

Fig. S1

**Table 1:** Comparison of the performance of hydrazine sensors based on various nanomaterials with the present work

| Electrode              | Sensitivity                        | Linear range      | LOD               | T <sub>res</sub> | Ref.         |
|------------------------|------------------------------------|-------------------|-------------------|------------------|--------------|
|                        | $\mu\text{A } \mu\text{M cm}^{-2}$ | ( $\mu\text{M}$ ) | ( $\mu\text{M}$ ) | (s)              |              |
| HMWCNT                 | 0.020                              | 2 - 122.8         | 0.68              | -                | 31           |
| CM/MWCNT               | 0.022                              | 2 - 44.0          | 1.40              | -                | 32           |
| Mn(II)-complex/MWNTs   | 0.038                              | 1-1050            | 0.50              | -                | 33           |
| WO <sub>3</sub>        | 0.184                              | -                 | 144.73            | -                | 34           |
| TiO <sub>2</sub> / CNT | -                                  | 0.35-162          | 0.22              | -                | 35           |
| GNF                    | 0.028                              | 0.5-7.5           | 0.30              | < 3              | 20           |
| Graphene               | -                                  | 3-300             | 1                 | -                | 25           |
| GNB                    | 0.080                              | 10-1360           | 1.10              | < 10             | Present work |

T<sub>res</sub> = response time
